# Supplementary material
Source: PubMed Central journal article supplement (PMC8377037)

Country (No. of released sequences / No. of confirmed cases)

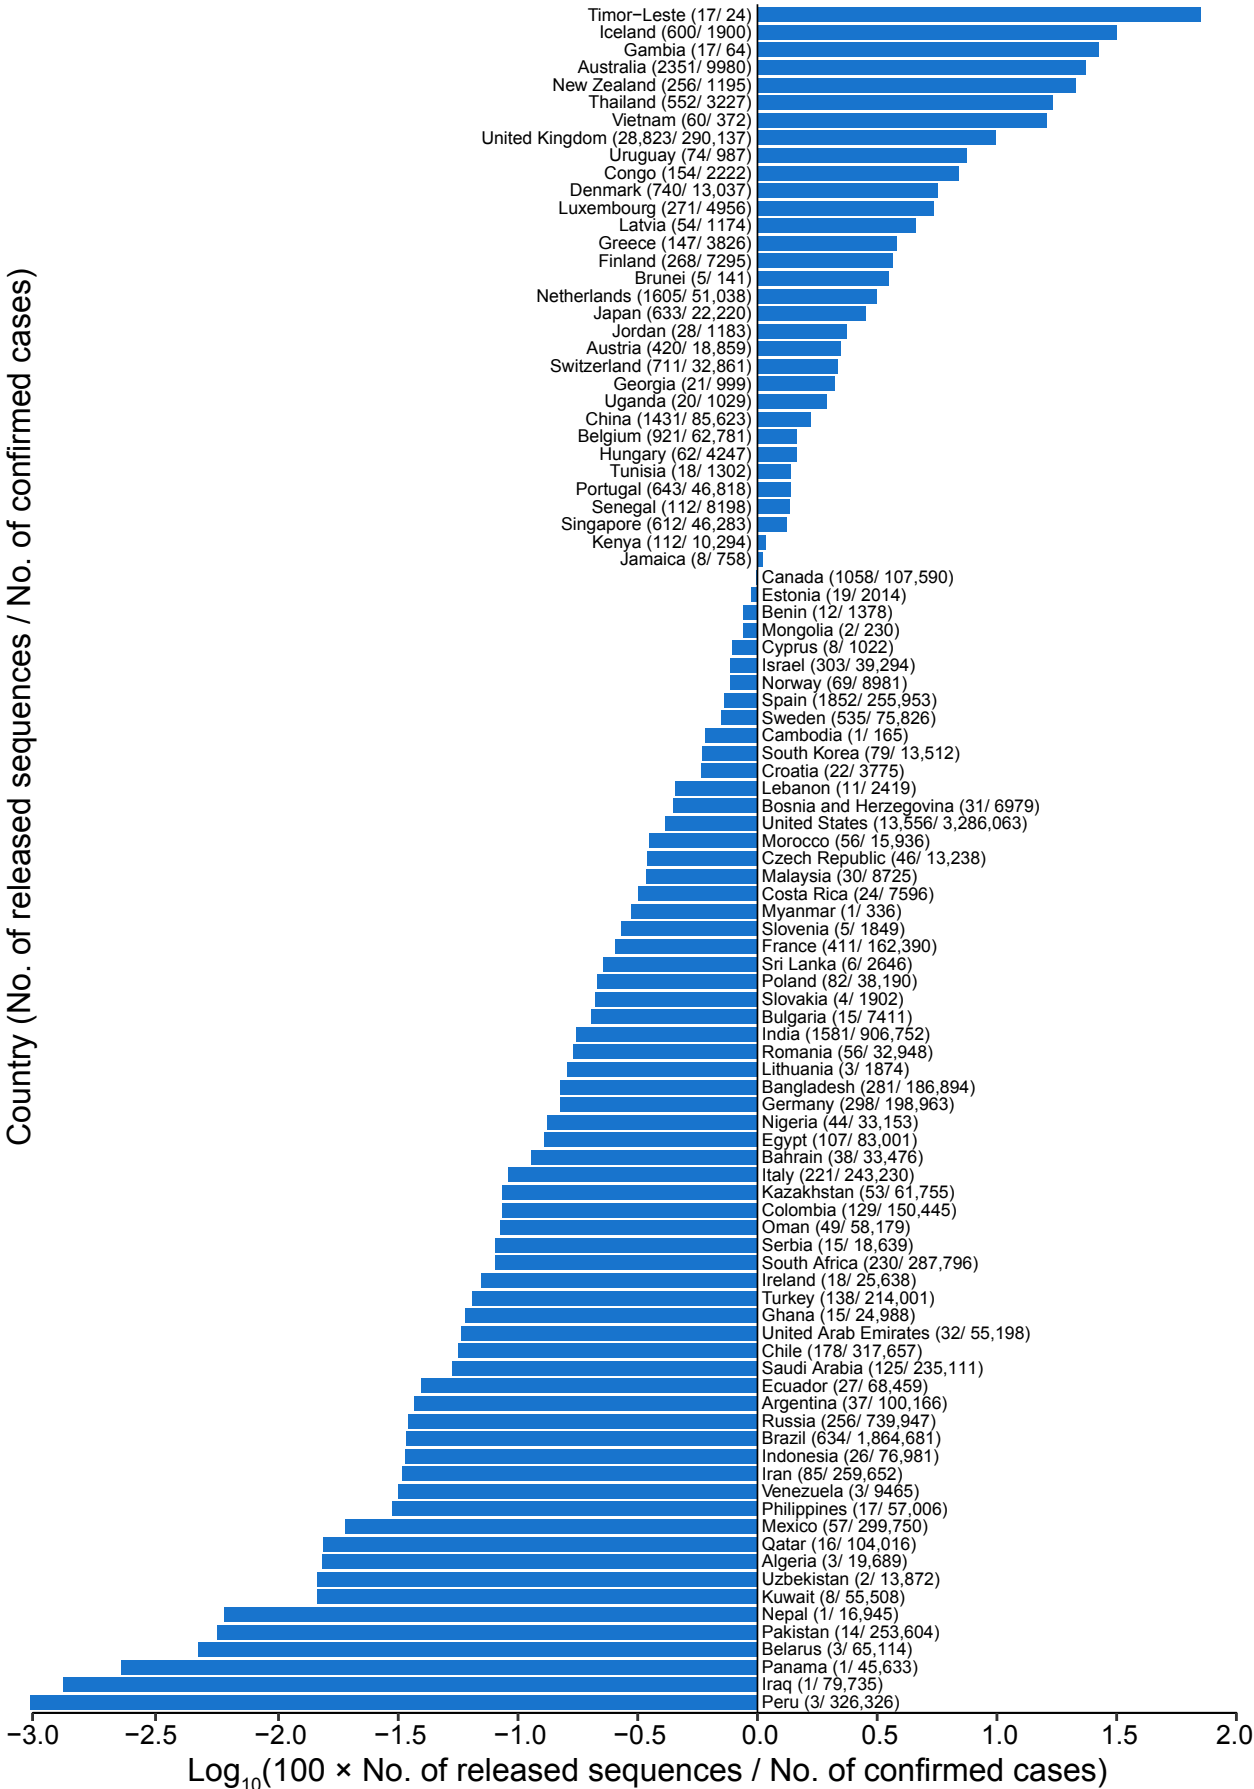

Supplement: mmc1.pdf [file mmc1.pdf]
